# Supplementary material
Source: publisher figshare collection journal article supplement (https://acs.figshare.com/ndownloader/files/4471207)
Supplement: Supplementary file 1 [file 4471207]

# All-Solid-State Dye-Sensitized Solar Cells with Alkyloxy-Imidazolium Iodide Ionic Polymer/SiO<sub>2</sub> Nanocomposite Electrolyte and Triphenylamine-Based Organic dyes

*Jifu Shi, Ling Wang, Yanliang Liang, Shengjie Peng, Fangyi Cheng and Jun Chen\**

Institute of New Energy Material Chemistry and Key Laboratory of Nanomaterials and Advanced  
Batteries/Cells (Ministry of Education), Chemistry College, Nankai University, Tianjin 300071,  
People's Republic of China

\*Corresponding author; Fax: (86) 22-2350-6808; E-mail: chenabc@nankai.edu.cn

**Table S1. Absorption, Emission, and Electrochemical Properties of TPAR14 and TC15 Dyes**

| Dye    | Adsorption             |                                            |                               | Emission                                  | Oxidation potential |                              |                                |
|--------|------------------------|--------------------------------------------|-------------------------------|-------------------------------------------|---------------------|------------------------------|--------------------------------|
|        | $\lambda_{\text{max}}$ | $\varepsilon_{\text{max}}$                 | $\lambda_{\text{max}}$ [nm]   |                                           | $E_{0-0}$ [V]       | $E_{\text{S+}/\text{S}}$ [V] | $E_{\text{S+}/\text{S}^*}$ [V] |
|        | [nm] <sup>[a]</sup>    | [M <sup>-1</sup> cm <sup>-1</sup> ]<br>[a] | (on TiO <sub>2</sub> )<br>[b] | $\lambda_{\text{em}}$ [nm] <sup>[a]</sup> | (Abs/Em)<br>[c]     | (vs. NHE)<br>[d]             | (vs. NHE)<br>[e]               |
| TPAR14 | 486                    | 39200                                      | 487                           | 616                                       | 2.34                | 1.15                         | -1.19                          |
| TC15   | 486                    | 34100                                      | 451                           | 571                                       | 2.33                | 1.11                         | -1.22                          |

[a] Absorption and emission spectra measured in dichloromethane solution ( $5 \times 10^{-5}$  M) at room temperature. [b] Absorption spectra of dye-adsorbed TiO<sub>2</sub> films sensitized from dichloromethane

solution. [c] The zero-zero transition  $E_{0-0}$  estimated from the intersection of the normalized absorption and emission spectra. [d] Cyclic voltammogram of the oxidation behavior of the dyes measured in dry dichloromethane solution containing 0.1 M tetrabutylammonium perchlorate (TBAP) as supporting electrolyte (scanning rate: 100 mV/s; working electrode: glassy carbon; reference electrode: Ag/AgCl calibrated with ferrocene/ferrocenium ( $\text{Fc}^+/\text{Fc}$ ) as an internal reference; counter electrode: Pt wire). [e]  $E_{\text{S}+/ \text{S}^*}$  gained from the difference of the  $E_{\text{S}+/ \text{S}}$  and  $E_{0-0}$  values.

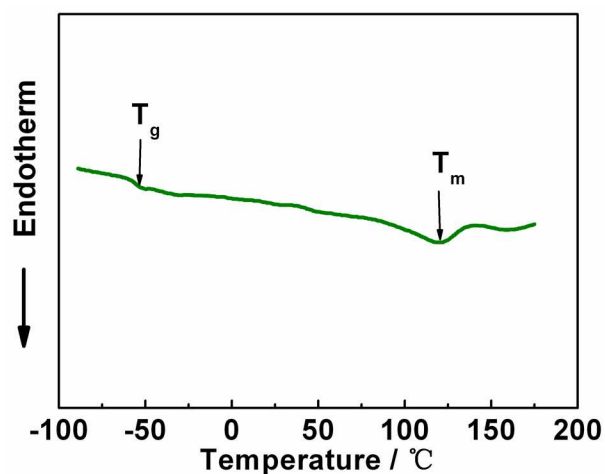

**Figure S1.** Differential scanning calorimetry thermogram of the optimal electrolyte, which is composed of  $\text{I}_2$  (with mole ratio of  $\text{I}_2/\text{O} = 0.9$ ), DMPIImI (with mole ratio of  $\text{DMPIImI}/\text{O} = 0.6$ ), and  $\text{SiO}_2$  (1 wt %) in AIIP.

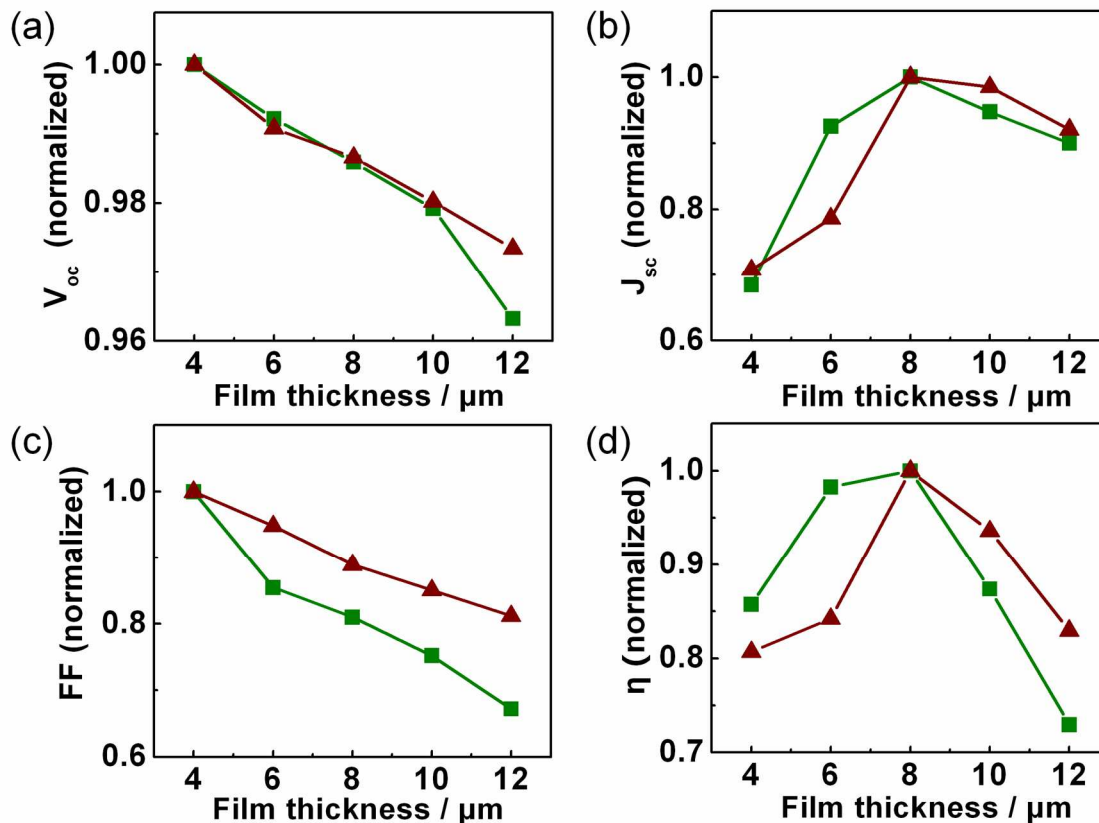

**Figure S2.** Normalized photovoltaic performance of all-solid-state solar cells sensitized by TPAR14 (red triangles) and TC15 (green squares) as a function of the nanocrystalline  $\text{TiO}_2$  film thickness: (a) open-circuit voltage,  $V_{oc}$ ; (b) short-circuit photocurrent density,  $J_{sc}$ ; (c) fill factor, FF; (d) energy conversion efficiency,  $\eta$ .

The correlation between the nanocrystalline  $\text{TiO}_2$  film thickness and the photovoltaic performance of the all-solid-state solar cells sensitized by TPAR14 or TC15 is depicted in Figure S2. The changes of  $V_{oc}$  (Figure S2a),  $J_{sc}$  (Figure S2b), FF (Figure S2c), and  $\eta$  (Figure S2d) for both the TPAR14- and TC15-based cells as a function of thickness of the  $\text{TiO}_2$  film are similar. The  $J_{sc}$  increases firstly and peaks at 8  $\mu\text{m}$ . The  $V_{oc}$  gradually decreases as the film thickness is increased. The increase of the film thickness can augment the surface area of the photoanode and provide additional charge-recombination sites, consequently lowering their quasi-Fermi level and reducing  $V_{oc}$ .<sup>S1</sup> In the mean time, the transport resistance of electrons in the  $\text{TiO}_2$  particles is increased with increasing thickness of film, leading to the

decrease of FF.<sup>S1</sup> The TiO<sub>2</sub> film thickness of these all-solid-state DSCs is optimized to be 8  $\mu\text{m}$  because the maximum  $\eta$  value is attained at this thickness.

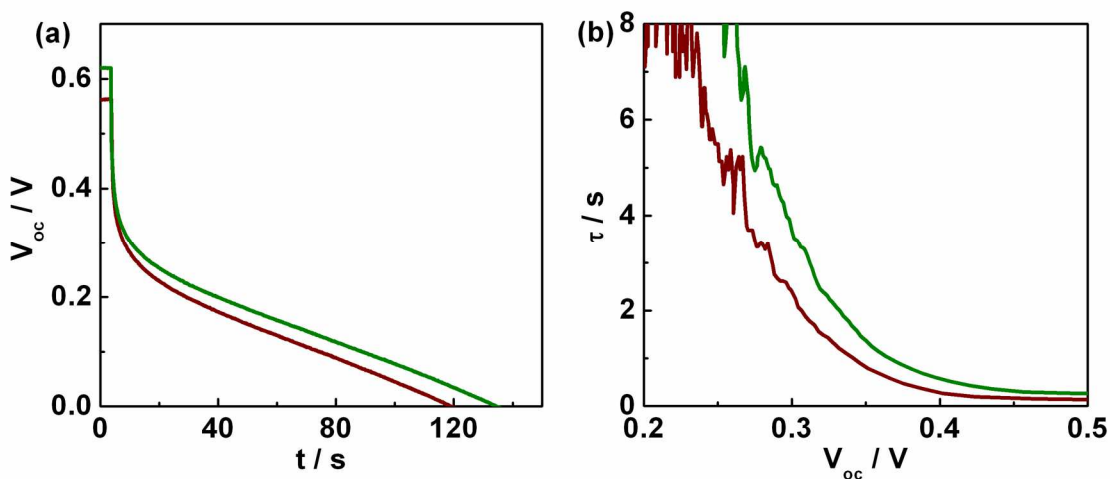

**Figure S3.** (a) Open-circuit voltage-decays of cell A (red line) and cell B (green line) after switching off the light. (b) Calculated electron lifetime vs  $V_{oc}$ .

The electron lifetime  $\tau$  can also be measured by the open-circuit voltage-decays (OCVD) of DSCs. Figure S3a shows the decay of  $V_{oc}$  that follows after switching off the light.<sup>S2</sup> The electron density falls when the illumination is interrupted due to the back reaction between the injected electrons and  $\text{I}_3^-$  ions at the TiO<sub>2</sub>/electrolyte interface, leading to the decay of the photovoltage. The electron lifetime,  $\tau$ , can be calculated from eq :<sup>S3,S4</sup>

$$\tau = -\frac{k_B T}{e} \left[ \frac{dV_{oc}}{dt} \right]^{-1} \quad (1)$$

The electron lifetime as a function of the  $V_{oc}$  is displayed in Figure S3b, in which, the lifetime increases approximately exponentially with decreasing  $V_{oc}$ . The electron lifetime of cell B is larger than that of cell A.

## References

(S1) Ito, S.; Zakeeruddin, S. M.; Humphry-Baker, R.; Liska, P.; Charvet, R.; Comte, P.; Nazeeruddin, M. K.; Péchy, P.; Takata, M.; Miura, H.; Uchida, S.; Grätzel, M. *Adv. Mater.* **2006**, *18*, 1202–1205.

(S2) Brown, P.; Takechi, K.; Kamat, P. V. *J. Phys. Chem. C* **2008**, *112*, 4776–4782.

(S3) Bisquert, J.; Zaban, A.; Greenshtein, M.; Mora-Seró, I. *J. Am. Chem. Soc.* **2004**, *126*, 13550–13559.

(S4) Shankar, K.; Bandara, J.; Paulose, M.; Wietasch, H.; Varghese, O. K.; Mor, G. K.; LaTempa, T. J.; Thelakkat, M.; Grimes, C. A. *Nano Lett.* **2008**, *8*, 1654–1659.
